# Supplementary material for: Microenvironment-responsive hydrogels with drug-loaded microspheres for sustained dexamethasone acetate release and experimental autoimmune uveitis suppression
Source: Royal Society of Chemistry journal article supplement (doi:10.1039/d5tb02106e), 2025-12-19
Supplement: d5tb02106e1.pdf [file d5tb02106e1.pdf]

## Supplementary information

### **Microenvironment-Responsive Hydrogels with Drug-Loaded Microspheres for Sustained Dexamethasone Acetate Release and Experimental Autoimmune Uveitis Suppression**

Xue Wu,<sup>‡a</sup> Lianyi Yang,<sup>‡b</sup> Qing Chen,<sup>‡a</sup> Ruijin Ran,<sup>c</sup> Jun Cao<sup>\*b</sup> and Ming Zhang<sup>\*a</sup>

#### **Affiliations**

<sup>a</sup>Department of Ophthalmology, West China Hospital, Sichuan University, Chengdu 610041, China.

<sup>b</sup>National Engineering Research Center for Biomaterials, Sichuan University, Chengdu 610064, China

<sup>c</sup>Department of Ophthalmology, Minda Hospital of Hubei Minzu University, Enshi 445000, Hubei Province, China.

† Electronic supplementary information (ESI) available

‡ The authors contribute equally to this work.

**\*Corresponding author:** correspondence to Ming Zhang and Jun Cao.

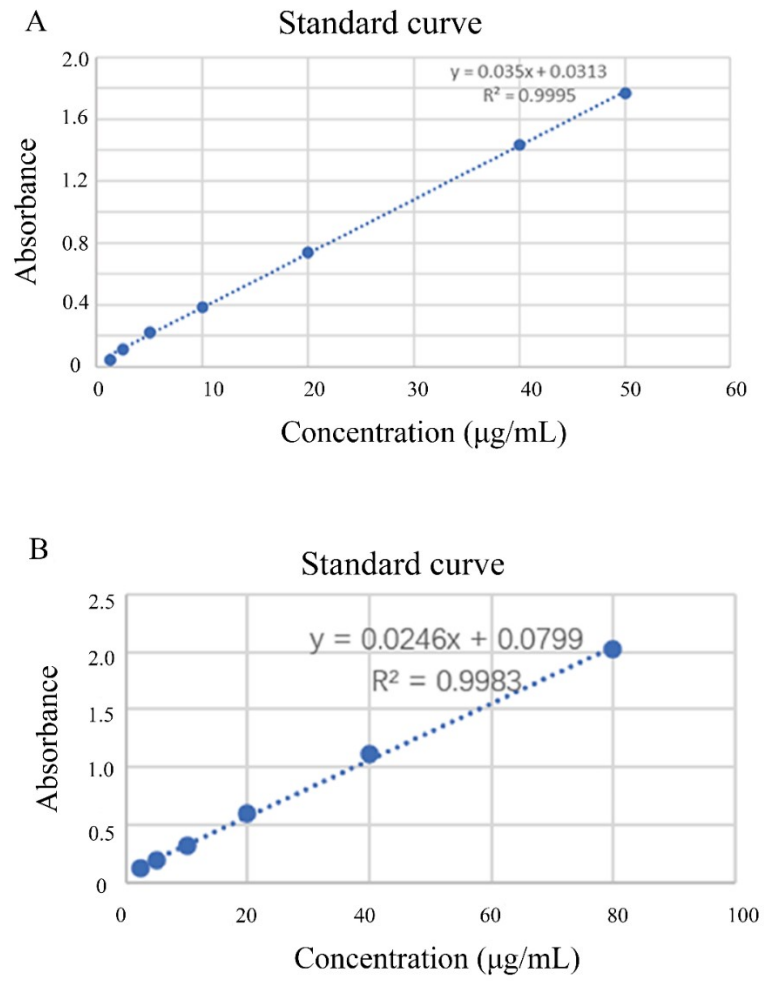

Fig. S1 Standard curve. (A) Standard curve of drug loading. (B) The standard curve of cumulative drug release.

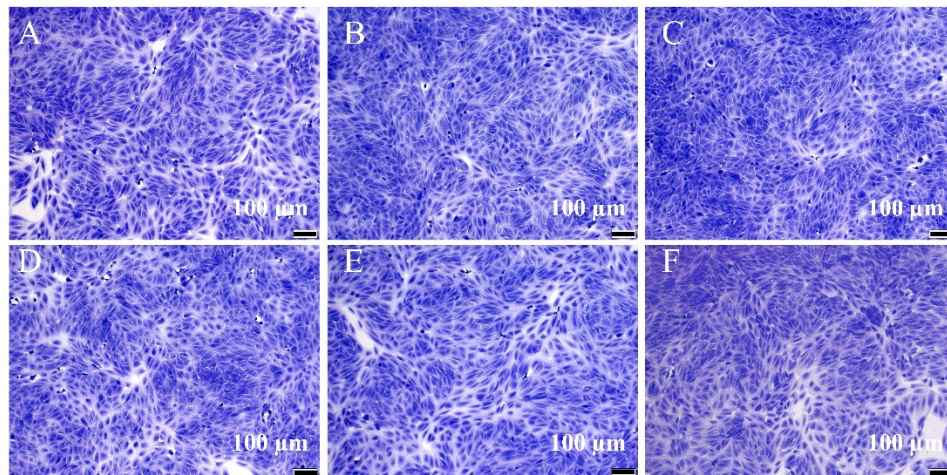

Fig. S2 Morphology of ARPE-19 cells after crystal violet staining. (A) Control group. (B–F) Hydrogel concentration gradients of 0.21 mg/mL, 0.62 mg/mL, 1.85 mg/mL, 5.56 mg/mL, and 16.67 mg/mL; scale bar: 100  $\mu\text{m}$ .

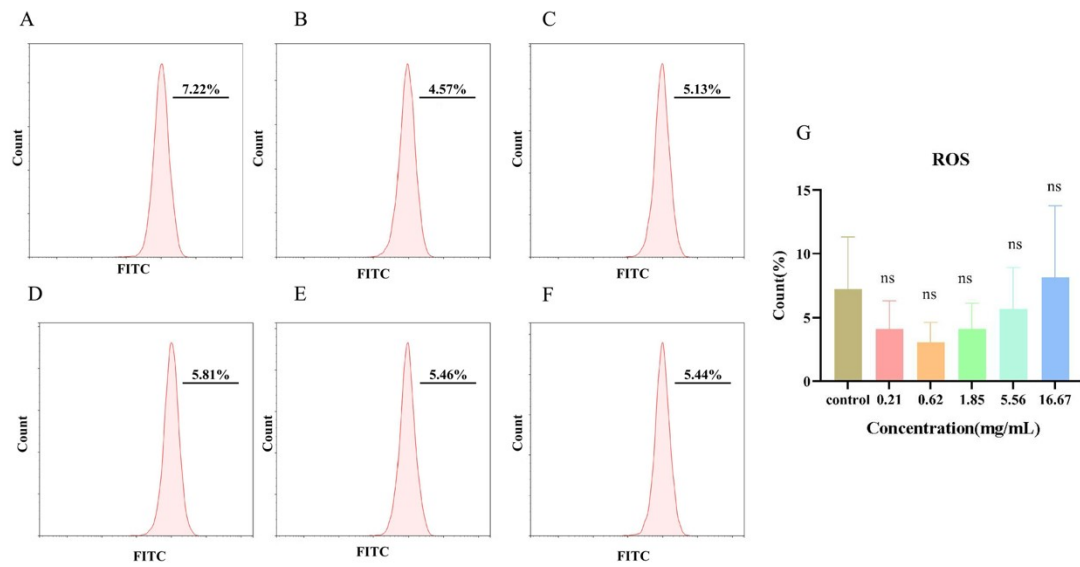

Fig. S3 ROS were detected via flow cytometry. (A) Control group. (B–F) Hydrogel concentration gradients of 0.21 mg/mL, 0.62 mg/mL, 1.85 mg/mL, 5.56 mg/mL, and 16.67 mg/mL respectively. (G) Statistical analysis of the ROS levels.

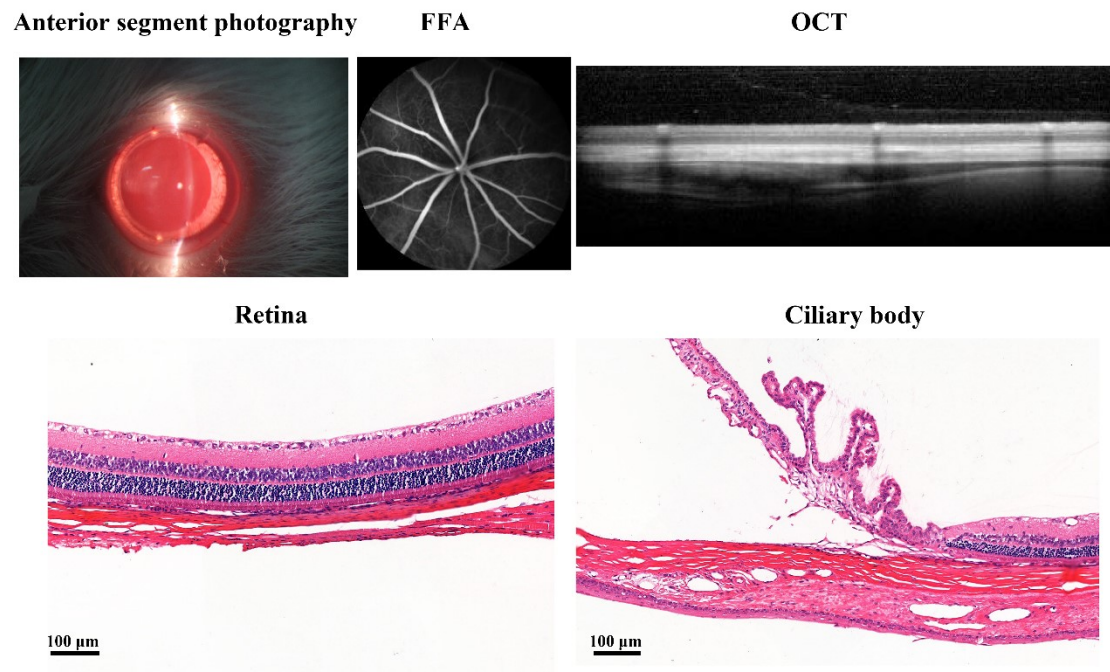

Fig. S4 Eye examination of normal rats. The scale bar for H&E staining was 100  $\mu$ m.
